# Supplementary material
Source: publisher figshare collection journal article supplement (https://sage.figshare.com/ndownloader/files/17534948)
Supplement: Supplementary file 1 [file 17534948]

## Appendix

**Table A.1.** Average growth in number of outbound business travels (2007-2016)

| <i>Country</i> | <i>%</i> | <i>Country</i>       | <i>%</i> |
|----------------|----------|----------------------|----------|
| Australia      | 1.49     | Macedonia            | 12.98    |
| Austria        | 0.86     | Malaysia             | 5.52     |
| Bahrain        | 5.86     | Mexico               | 3.41     |
| Belgium        | 3.14     | Netherlands          | 3.07     |
| Brazil         | 2.87     | New Zealand          | 1.84     |
| Bulgaria       | 9.12     | Nigeria              | -0.53    |
| Canada         | 2.7      | Norway               | -0.19    |
| Chile          | 14.6     | Peru                 | 5.22     |
| China          | 11.9     | Philippines          | 2.46     |
| Colombia       | 7.08     | Poland               | -1.99    |
| Costa Rica     | 7.75     | Portugal             | 0.43     |
| Croatia        | 5.73     | Qatar                | 3.31     |
| Czech          | 4.81     | Romania              | 9.06     |
| Denmark        | 4.95     | Russia               | -2.33    |
| Ecuador        | 5.96     | Saudi Arabia         | 6.04     |
| Estonia        | 8.3      | Serbia               | 9.78     |
| Finland        | 1.75     | Singapore            | 3.04     |
| France         | 2.02     | Slovakia             | 4.7      |
| Georgia        | 12.88    | Slovenia             | 3.2      |
| Germany        | 1.49     | South Africa         | 7.07     |
| Greece         | 6.83     | South Korea          | 9.6      |
| Hong Kong      | 0.56     | Spain                | 3.23     |
| Hungary        | 2.68     | Sri Lanka            | 5.31     |
| India          | 8.79     | Sweden               | 3.23     |
| Indonesia      | 5.88     | Switzerland          | 3.1      |
| Ireland        | 3.32     | Thailand             | 6.33     |
| Israel         | 6.82     | Turkey               | 5.05     |
| Italy          | 0.96     | Uganda               | 4.37     |
| Japan          | -0.28    | United Arab Emirates | 5.91     |
| Latvia         | 4.39     | United Kingdom       | 0.78     |
| Lithuania      | 0.25     | USA                  | 2.67     |

**Table A.2.** Variable descriptions and data sources

| Notation | Variables                                         | Definition                                                                                                                                                                                                                                                                                                                                                                                                                                                                                                                                                                                                                     | Data source                | Transformation          |
|----------|---------------------------------------------------|--------------------------------------------------------------------------------------------------------------------------------------------------------------------------------------------------------------------------------------------------------------------------------------------------------------------------------------------------------------------------------------------------------------------------------------------------------------------------------------------------------------------------------------------------------------------------------------------------------------------------------|----------------------------|-------------------------|
| OBT      | Growth in outbound business travels               | Business departures include international trips by residents for business purposes including unmanaged and managed, meetings, incentives, conferences and exhibitions.                                                                                                                                                                                                                                                                                                                                                                                                                                                         | Euromonitor International  |                         |
| CPI      | Corruption perception index                       | This index defines corruption as “the misuse of public office for personal (or party political) financial gain”. The CPI ranges countries from 0 (totally corrupt) to 100 (not corrupt or very clean). It ranks countries and territories based on how corrupt their public sector is perceived to be by expert assessments and opinion surveys.                                                                                                                                                                                                                                                                               | Transparency International | Logarithmic, 1 year lag |
| IEF      | Index of economic freedom                         | The IEF focuses on four key aspects of the economic environment over which governments typically exercise policy control: rule of law, government size, regulatory efficiency, and market openness. In assessing conditions in these four categories, the IEF measures 12 specific components of economic freedom, each of which is graded on a scale from 0 to 100 where higher scores show better economic freedom. Scores on these 12 components of economic freedom, which are calculated from a number of sub-variables, are equally weighted and averaged to produce an overall economic freedom score for each economy. | Heritage Foundation        | Logarithmic, 1 year lag |
| TRADE    | Trade (percentage of GDP)                         | The sum of exports and imports of goods and services as a share of GDP.                                                                                                                                                                                                                                                                                                                                                                                                                                                                                                                                                        | World Bank                 |                         |
| GDPc     | GDP per capita based on purchasing power parity   | It is GDP converted to international dollars using purchasing power parity rates. An international dollar has the same purchasing power over GDP as the U.S. dollar has in the United States.                                                                                                                                                                                                                                                                                                                                                                                                                                  | World Bank                 | Logarithmic             |
| TRA_LES  | Leisure outbound per household                    | Leisure departures refer to all international trips by national residents for leisure purposes including recreational trips/holidays, visiting friends and relatives, and other purposes (such as sports, education, medical, shopping and religion).                                                                                                                                                                                                                                                                                                                                                                          | Euromonitor International  | Logarithmic             |
| PSTAB    | Political stability and absence of violence index | It measures perceptions of the likelihood that the government will be destabilized or overthrown by unconstitutional or violent means, including politically motivated violence and terrorism. The indicator scores range between approximately -2.5 and +2.5, with higher values indicating higher political stability within a country.                                                                                                                                                                                                                                                                                      | World Bank                 |                         |
| EXCH     | Countries’ exchange rates against US dollar       | It is countries’ exchange rates against US dollar.                                                                                                                                                                                                                                                                                                                                                                                                                                                                                                                                                                             | Euromonitor International  | Logarithmic             |
| COST     | Index of air travel prices                        | It is estimated using a sample of prices for a defined set of goods or services from the air travel category. Air travel refers to the transport of individuals and groups of persons and luggage by aeroplane and helicopter. The indices’ base year is 2010 = 100.                                                                                                                                                                                                                                                                                                                                                           | Euromonitor International  | Logarithmic             |
| FDI      | Foreign direct investment                         | Foreign direct investments, net outflows as percentage of GDP. FDI refers to direct investment equity flows in an economy. It is the sum of equity capital, reinvestment of earnings, and other capital.                                                                                                                                                                                                                                                                                                                                                                                                                       | World Bank                 |                         |

**Table A.3.** Descriptive statistics (before transformation) for full sample, 2007-2016

|         | Mean       | Standard Deviation |
|---------|------------|--------------------|
| OBT     | 0.045      | 0.122              |
| CPI     | 50.659     | 20.450             |
| IEF     | 67.768     | 8.765              |
| TRADE   | 0.956      | 0.674              |
| GDPc    | 29,820.855 | 20,850.011         |
| TRA_LES | 1.756      | 2.131              |
| PSTAB   | 0.212      | 0.878              |
| EXCH    | 296.331    | 1,400.235          |
| COST    | 106.803    | 16.171             |
| FDI     | 0.037      | 0.084              |

Notes: OBT is growth in outbound business trips; CPI is Corruption Perception Index; IEF is Index of Economic Freedom; TRADE is trade (percentage of GDP); GDPc is GDP per capita based on purchasing power parity; TRA\_LES is leisure outbound per household; PSTAB is political stability and absence of violence index; EXCH is countries' exchange rates against US dollar; COST is index of air travel prices; FDI is foreign direct investment, net outflows as percentage of GDP. Please note that higher values of CPI indicate lower levels of corruption within a country.
